# Supplementary material for: Identification of Biochemical and Molecular Markers of Early Aging in Childhood Cancer Survivors
Source: MDPI journal article supplement (doi:10.3390/cancers13205214), 2021-10-18
Supplement: s1 [file s1]

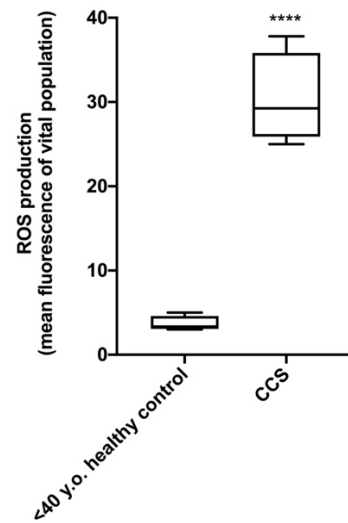

**Figure S1.** Evaluation of ROS production in MNC isolated from CCS and age-matched healthy control. Graph reports the ROS production in MNC isolated from age-matched healthy controls and CCS patients, stained with the fluorescent probe H2DCFDA and analyzed by flow cytometry. Data derive from five independent experiments. Statistical analysis was performed by non-parametric statistical approach (Mann-Whitney U test), and \*\*\*\* indicates a significant difference for  $p < 0.0001$ .

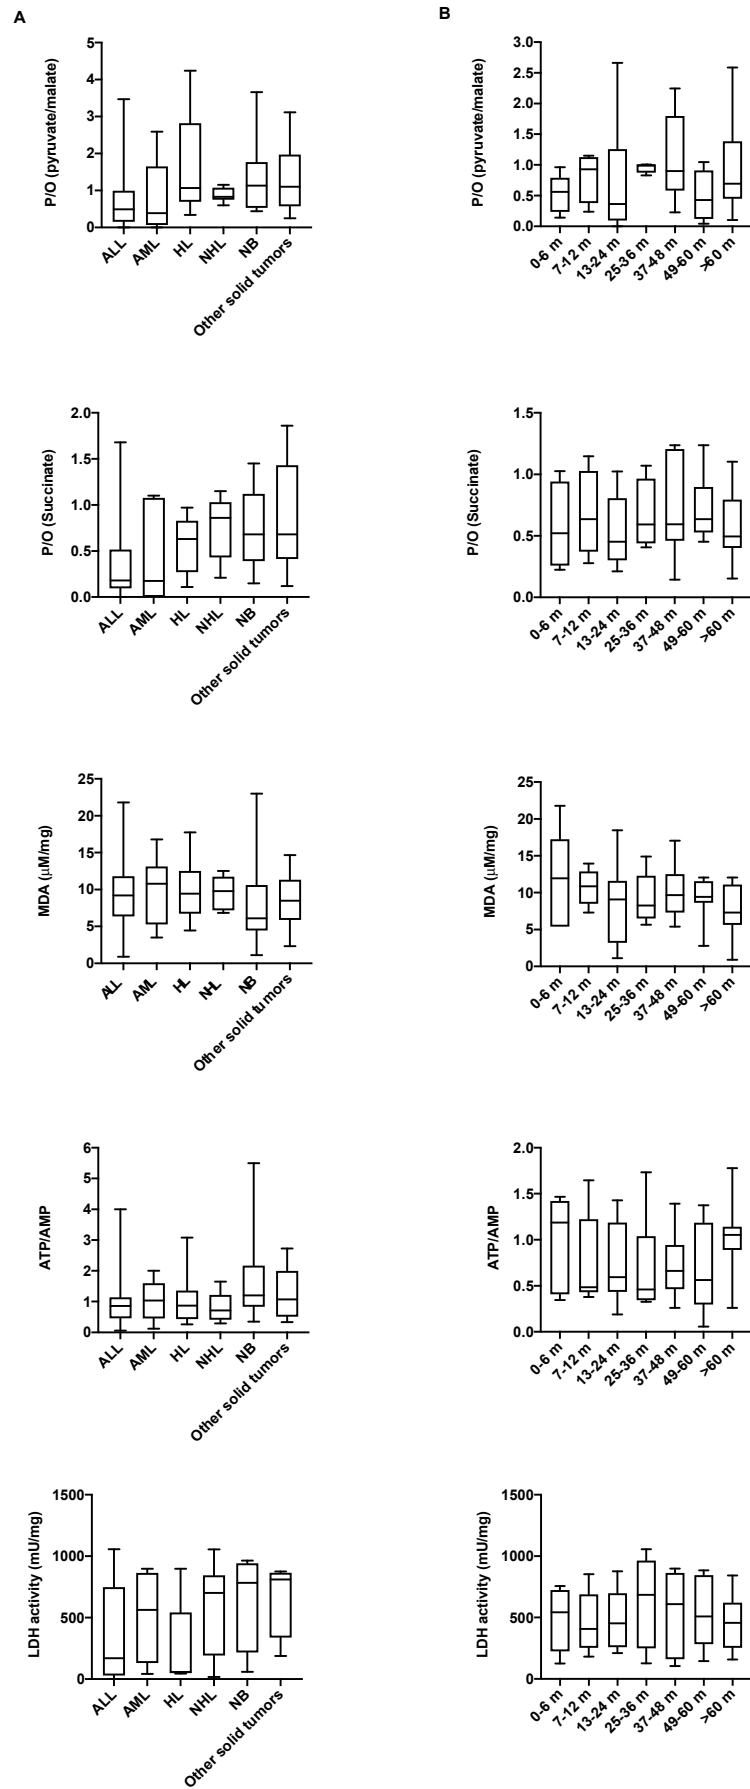

**Figure S2.** Comparison of glucose metabolism alteration in different type of tumors. Panel **A** shows the P/O values (obtained as the ratio between ATP synthesis and oxygen consumption, in the presence of pyruvate + malate or succinate), MDA concentration, ATP/AMP ratio and LDH activity in MNCs

isolated from patients who survived the following types of tumors: acute lymphocytic leukemia (ALL; n = 42), Acute myeloid leukemia (AML; n = 15), Hodgkin lymphoma (HL; n = 19), Non-Hodgkin lymphoma (NHL; n = 13), Neuroblastoma (NB; n = 34), and other solid tumors (n = 21). Panel **B** reports the same biochemical parameters reported in Panel A in the MNCs isolated from CCS patients clustered based on the time elapsed since the last clinical treatment at the time of blood collection. The time is indicated in months: 0-6 months (n = 12), 7-12 months (n = 20), 13-24 months (n = 15), 25-36 months (n = 34), 37-48 months (n = 24), 49-60 months (n = 18), >60 months (n = 21). Statistical analysis was performed by non-parametric statistical approach (Mann-Whitney U test). No significant differences have been observed among the analyzed samples.
