# Supplementary figures and images for: Identification of Biochemical and Molecular Markers of Early Aging in Childhood Cancer Survivors
Source: MDPI journal article supplement (doi:10.3390/cancers13205214), 2021-10-18

## MATERIAL FOR REVIEWER

### Original Western Blot Signal

#### 1) CLUH

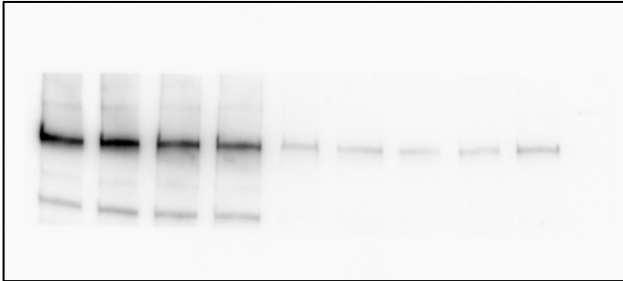

#### 2) PGC-1 $\alpha$

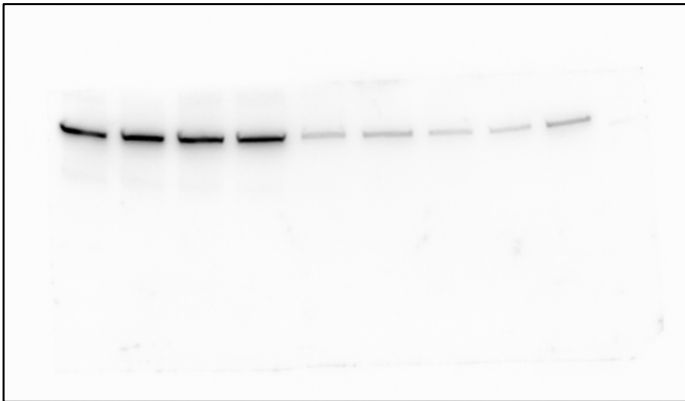

#### 3) SIRT6

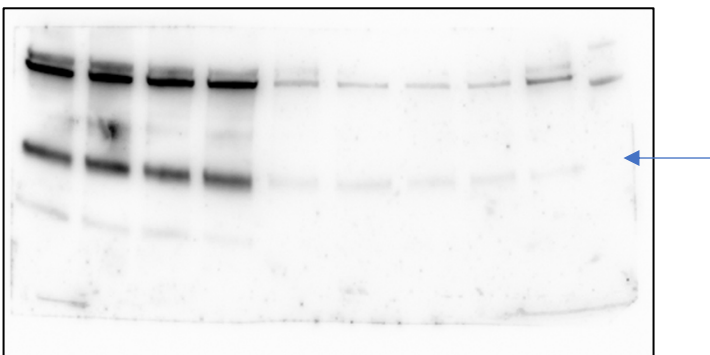

#### 4) Actin

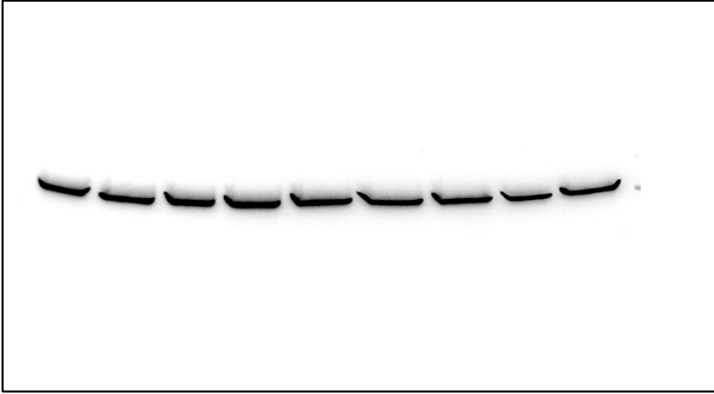

Supplement: s1 [file s1]
